# Supplementary material for: The Influence of Heterochronic Non-Myeloablative Bone Marrow Transplantation on the Immune System, Frailty, General Health, and Longevity of Aged Murine Recipients
Source: MDPI journal article supplement (doi:10.3390/biom12040595), 2022-04-18
Supplement: s1 [file s1]

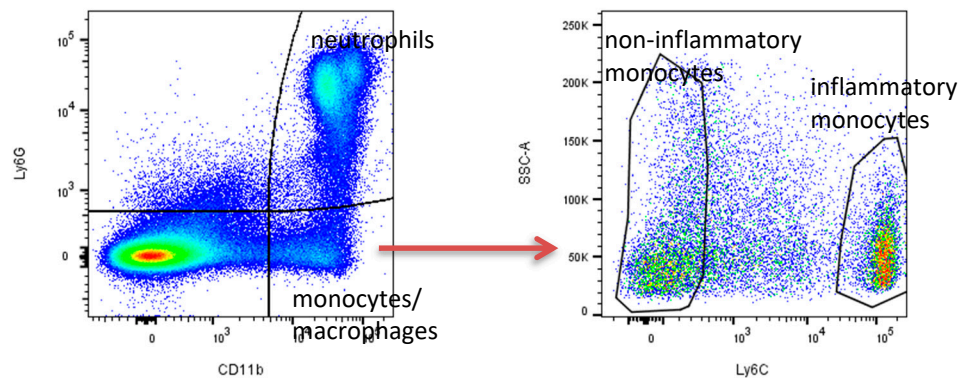

**Figure S1:** Flow cytometry gating strategy for neutrophils, monocytes/macrophages, inflammatory and non-inflammatory monocytes. Analyzed cells were live single cells (FSC/SSC, SSC-H/SSC-W, FSC-H/FSC-W, and 7-AAD/SSC-A dot plots are not shown).

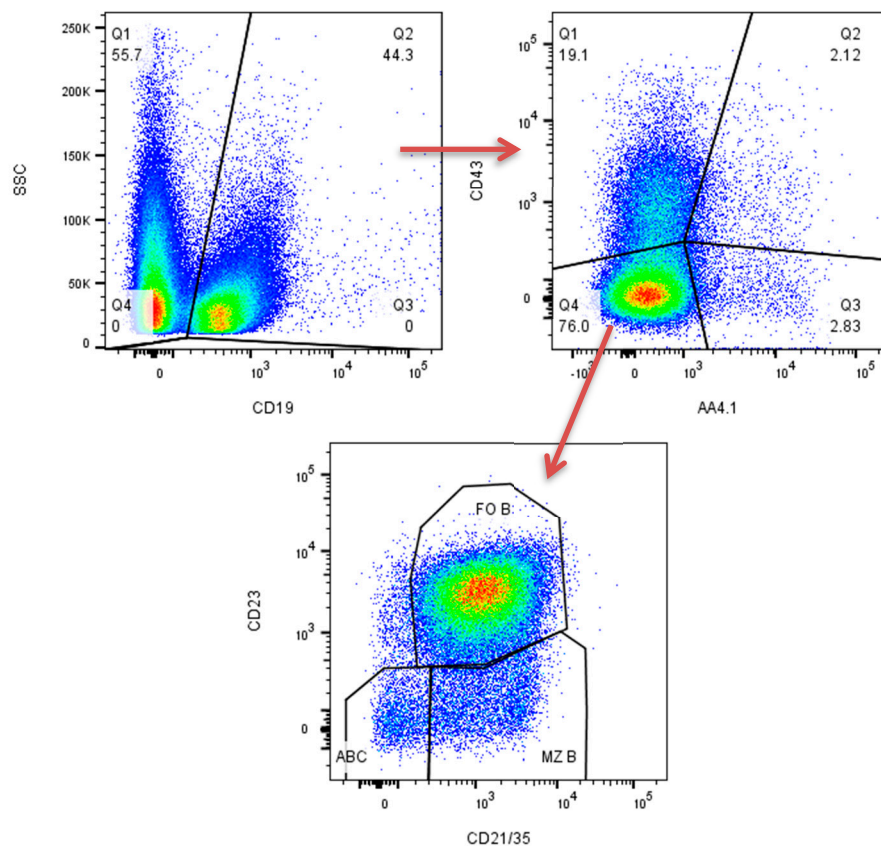

**Figure S2:** Flow cytometry gating strategy for ABCs, FO B cells and MZ B cells. Analyzed cells were live single cells.



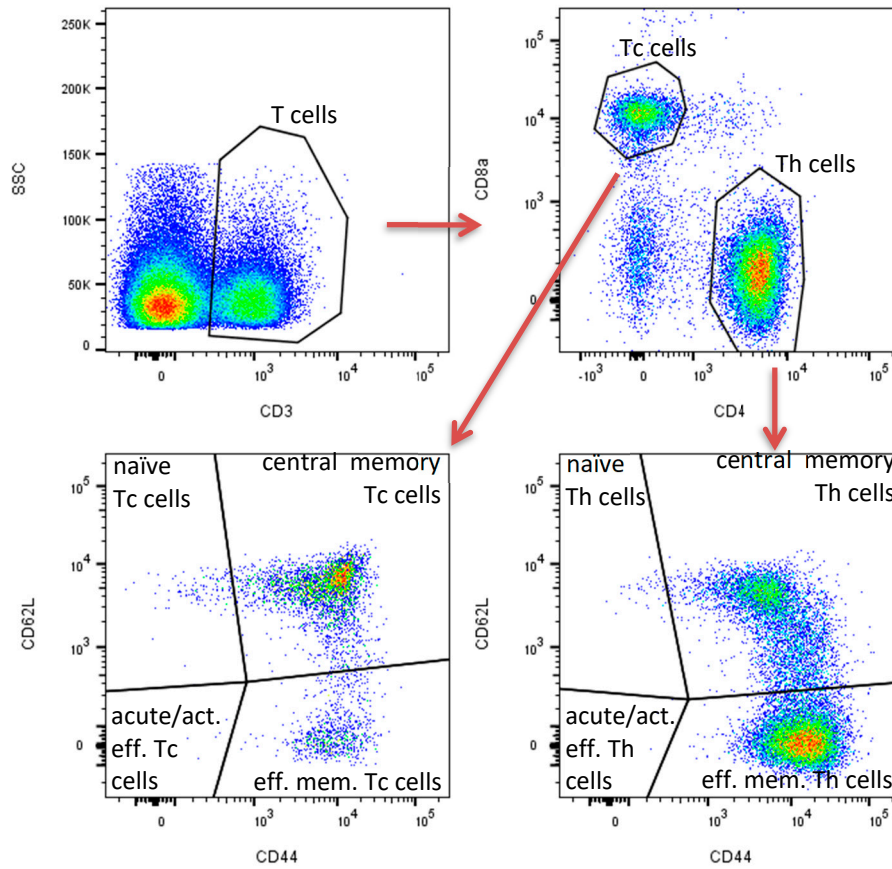

**Figure S3:** Flow cytometry gating strategy for Th and Tc cells. Analyzed cells were live single cells.

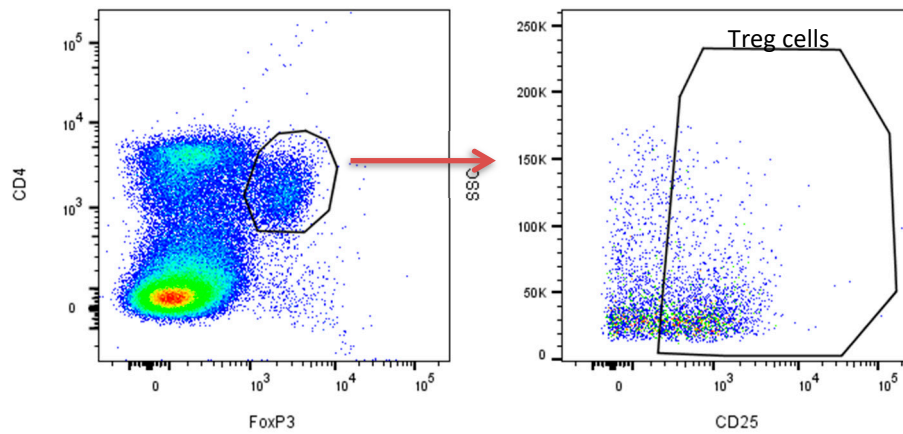

**Figure S4:** Flow cytometry gating strategy for Treg cells. Analyzed cells were single cells.



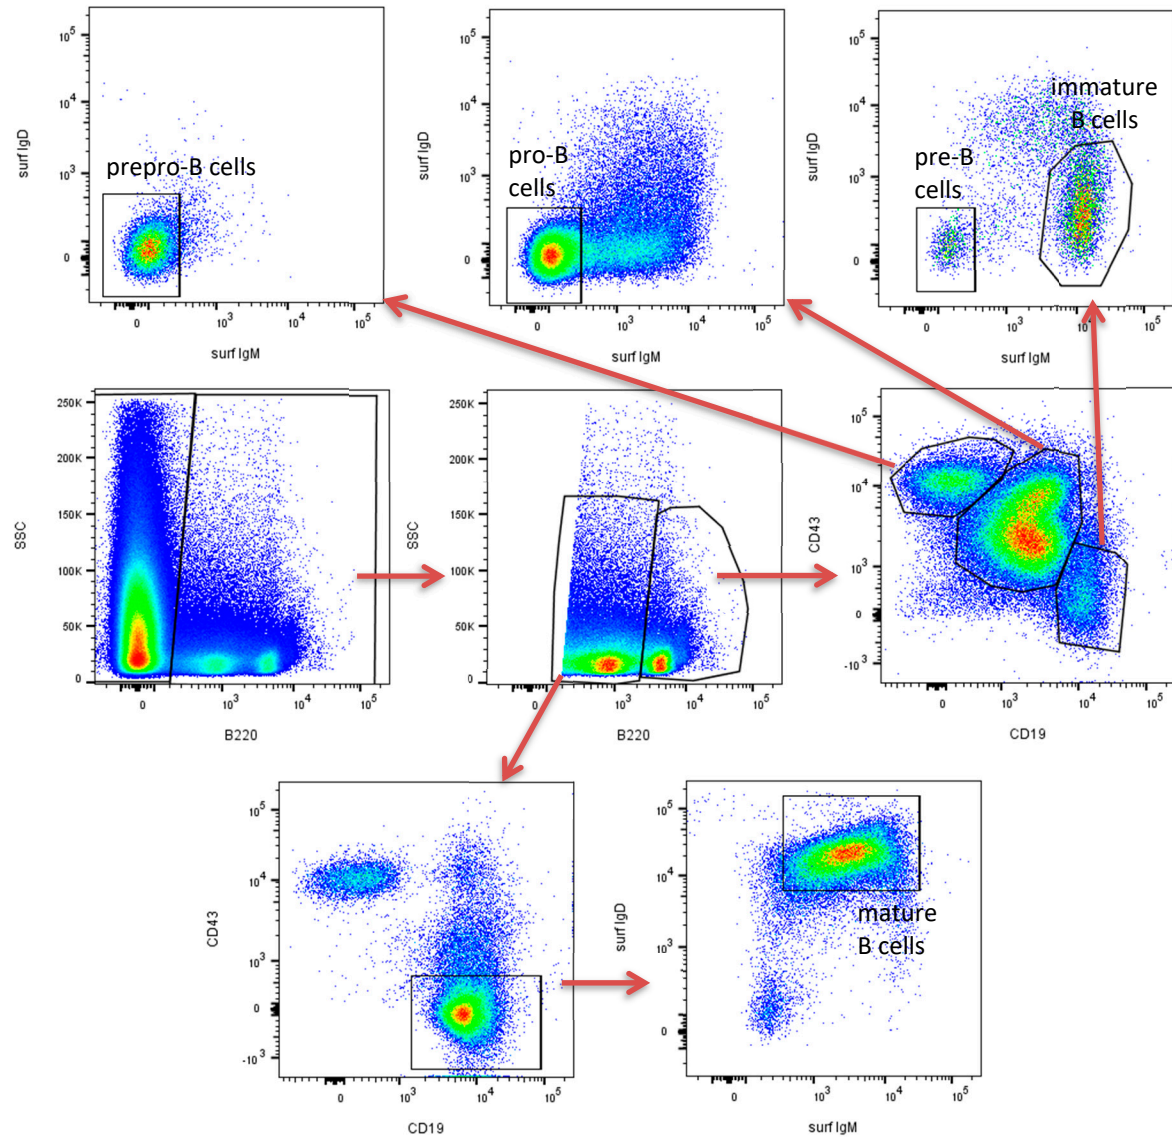

**Figure S5:** Flow cytometry gating strategy for prepro-B, pre-B, pro-B, immature and mature B cells. Analyzed cells were live single cells.



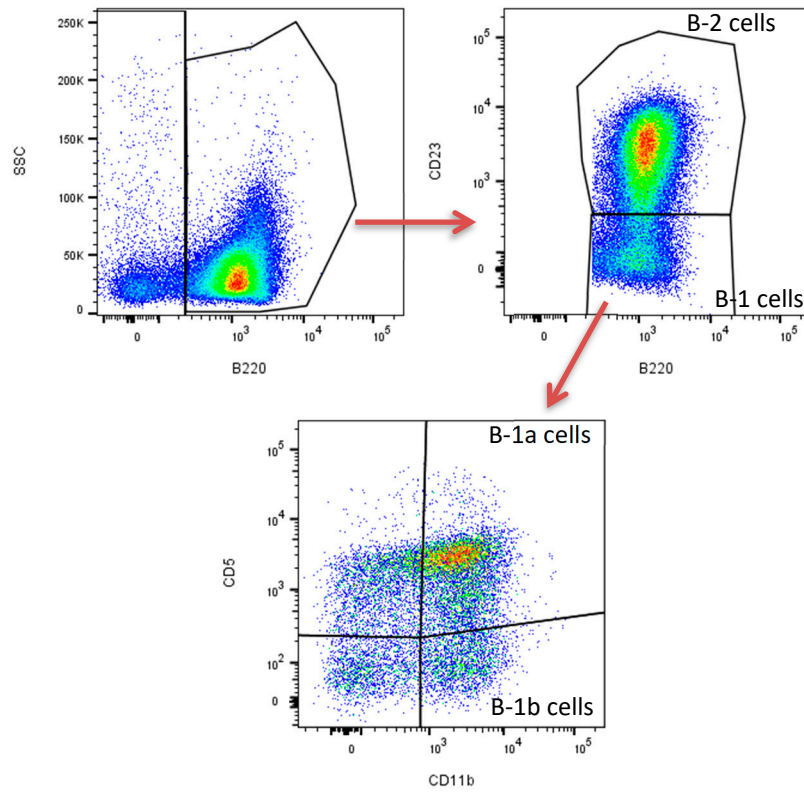

**Figure S6:** Flow cytometry gating strategy for B-2 and B-1 cells. Analyzed cells were live single cells.
