# Supplementary material for: The Influence of Heterochronic Non-Myeloablative Bone Marrow Transplantation on the Immune System, Frailty, General Health, and Longevity of Aged Murine Recipients
Source: MDPI journal article supplement (doi:10.3390/biom12040595), 2022-04-18
Supplement: s1 [file s1]

**Table S1.** Source data for the heatmap.

| FinalName                                    | BMT       | SHAM      | Y         | %CV  | BMT vs SHAM | Y vs SHAM |
|----------------------------------------------|-----------|-----------|-----------|------|-------------|-----------|
| spleen, monocytes/macrophages [%]            | 4,86      | 3,83      | 6,98      | 24%  | 0,34        | 0,87      |
| spleen, monocytes, inflammatory [%]          | 15,08     | 16,62     | 6,73      | 45%  | -0,14       | -1,30     |
| spleen, monocytes, non-inflammatory [%]      | 56,74     | 53,81     | 54,83     | 8%   | 0,08        | 0,03      |
| spleen, neutrophils [%]                      | 2,68      | 1,86      | 2,29      | 77%  | 0,53        | 0,30      |
| spleen, monocytes, non-inflammatory [MFI]    | 1,901915  | 1,7982858 | 2,0559477 | 18%  | 0,08        | 0,19      |
| spleen, IL-6 [cCK, pg/ml]                    | 22,72578  | 32,6103   | 12,691613 | 61%  | -0,52       | -1,36     |
| spleen, TNF [cCK, pg/ml]                     | 11,06717  | 14,65864  | 16,8908   | 73%  | -0,41       | 0,20      |
| BM, neutrophils [%]                          | 27,4      | 37,1      | 31,9      | 28%  | -0,44       | -0,22     |
| BM, monocytes/macrophages [%]                | 8,9       | 11,2      | 10,7      | 11%  | -0,33       | -0,07     |
| peritoneal cavity, monocytes/macrophages [%] | 19,5      | 24        | 30,7      | 47%  | -0,30       | 0,36      |
| proliferation, control [cGy]                 | 1474,987  | 1597,133  | 437,307   | 75%  | -0,11       | -1,87     |
| proliferation, PHA [cGy]                     | 3367,627  | 4103,253  | 5211,063  | 51%  | -0,29       | 0,34      |
| proliferation, PHA+PMA [cGy]                 | 26524,7   | 21003,14  | 43449,12  | 30%  | 0,34        | 1,05      |
| HSC / live cell no.                          | 0,0000864 | 0,0000757 | 0,0000578 | 19%  | 0,19        | -0,39     |
| BM, B cells [%]                              | 23,3      | 25,2      | 17,4      | 25%  | -0,11       | -0,53     |
| B cells, mature [%]                          | 14,4      | 11,8      | 3,9       | 54%  | 0,29        | -1,60     |
| B cells, prepro-B [%]                        | 4,9       | 3,6       | 7,6       | 24%  | 0,44        | 1,08      |
| B cells, immature [%]                        | 1,5       | 1,1       | 0,2       | 63%  | 0,45        | -2,46     |
| B cells, pre-B [%]                           | 0,3       | 0,3       | 0,4       | 39%  | 0,00        | 0,42      |
| B cells, pro-B [%]                           | 42,3      | 46,1      | 60        | 18%  | -0,12       | 0,38      |
| spleen, B cells [%]                          | 58,3      | 61,2      | 51,5      | 8%   | -0,07       | -0,25     |
| B cells, ABC [%]                             | 5,8       | 4,6       | 1,2       | 59%  | 0,33        | -1,94     |
| B cells, FO B [%]                            | 85,4      | 84,5      | 89,1      | 3%   | 0,02        | 0,08      |
| B cells, MZ B [%]                            | 7,1       | 9         | 9,2       | 25%  | -0,34       | 0,03      |
| peritoneal cavity, B cells [%]               | 73,9      | 80,3      | 72        | 33%  | -0,12       | -0,16     |
| B cells, B1 [%]                              | 64,4      | 44        | 39,6      | 23%  | 0,55        | -0,15     |
| B cells, B-1a [%]                            | 62,7      | 46,3      | 56        | 19%  | 0,44        | 0,27      |
| B cells, B-1b [%]                            | 12,7      | 22,4      | 18        | 29%  | -0,82       | -0,32     |
| B cells, B-2 [%]                             | 35,6      | 56        | 60,4      | 32%  | -0,65       | 0,11      |
| T cells [%]                                  | 30        | 30,5      | 34,1      | 7%   | -0,02       | 0,16      |
| Th cells [%]                                 | 62,2      | 65,1      | 64,4      | 10%  | -0,07       | -0,02     |
| Th cells, acute/effector [%]                 | 0,2       | 0,4       | 0,1       | 127% | -1,00       | -2,00     |
| Th cells, central memory [%]                 | 36,3      | 28        | 66,1      | 40%  | 0,37        | 1,24      |
| Th cells, effector [%]                       | 63,3      | 71,4      | 33,3      | 29%  | -0,17       | -1,10     |
| Th cells, naive [%]                          | 0,2       | 0,2       | 0,6       | 51%  | 0,00        | 1,58      |
| Tc cells [%]                                 | 21        | 20,4      | 24,6      | 14%  | 0,04        | 0,27      |
| Tc cells, acute/effector [%]                 | 0,9       | 0,7       | 0,7       | 36%  | 0,36        | 0,00      |
| Tc cells, central memory [%]                 | 75,8      | 65,1      | 77,2      | 8%   | 0,22        | 0,25      |
| Tc cells, effector [%]                       | 20,5      | 32,8      | 15,8      | 27%  | -0,68       | -1,05     |
| Tc cells, naive [%]                          | 2,8       | 1,3       | 6,2       | 61%  | 1,11        | 2,25      |
| CD4+FoxP3+ [%]                               | 3,4       | 4         | 2,8       | 23%  | -0,23       | -0,51     |
| CD4+FoxP3+CD25+ [%]                          | 63,3      | 66,4      | 65,4      | 14%  | -0,07       | -0,02     |
